# Supplementary material for: Biodiversity on the Rocks: Macrofauna Inhabiting Authigenic Carbonate at Costa Rica Methane Seeps
Source: PLoS One. 2015 Jul 9;10(7):e0131080. doi: 10.1371/journal.pone.0131080 (PMC4497642; doi:10.1371/journal.pone.0131080)
Supplement: S1 Table — Mean per 200 cm2, Standard Error and percent of the total. (XLSX) [file pone.0131080.s001.xlsx]

## Sheet: Appendix I JG
Supplemental Table 1. Macrofaunal densities on authigenic carbonates by site and seepage activity. Mean per 200 cm2, Standard Error and percent of the total.
Site		Quepos Landslide	Quepos Landslide	Quepos Landslide		Jaco Summit	Jaco Summit	Jaco Summit		Mound 12	Mound 12	Mound 12	Mound 12	Mound 12	Mound 12		Mound 11	Mound 11	Mound 11	Mound 11	Mound 11	Mound 11		Mound Quepos	Mound Quepos	Mound Quepos	Mound Quepos	Mound Quepos	Mound Quepos		Jaco Wall	Jaco Wall	Jaco Wall	Jaco Wall	Jaco Wall	Jaco Wall
Activity		Inactive	Inactive	Inactive		Inactive	Inactive	Inactive		Active	Active	Active	Inactive	Inactive	Inactive		Active	Active	Active	Inactive	Inactive	Inactive		Active	Active	Active	Inactive	Inactive	Inactive		Active	Active	Active	Inactive	Inactive	Inactive
Function		mean	SE	% of Total		mean	SE	% of Total		mean	SE	% of Total	mean	SE	% of Total		mean	SE	% of Total	mean	SE	% of Total		mean	SE	% of Total	mean	SE	% of Total		mean	SE	% of Total	mean	SE	% of Total
Sample Size (n)		5	5	5		2	2	2		14	14	14	3	3	3		4	4	4	6	6	6		1	1	1	2	2	2		1	1	1	3	3	3
Annelida
Acrocirrus sp.		0.088	0.088	0.617284		0	0	0		0	0	0	0	0	0		0	0	0	0	0	0		0		0	0	0	0		0		0	0	0	0
Ampharetidae sp. 1		0	0	0		0	0	0		0	0	0	0	0	0		0.6475	0.479364	0.577223	0	0	0		1.07		1.19048	0	0	0		0		0	0	0	0
Ampharetidae sp. 2		0	0	0		0	0	0		0	0	0	0	0	0		0.035	0.035	0.0312012	0	0	0		0		0	0	0	0		0		0	0	0	0
Ampharetidae spp.		0.176	0.176	1.23457		0.13	0.13	1.12749		3.05714	1.48471	1.43573	0	0	0		1.61	1.56368	1.43526	0.7735	0.379206	1.65501		0		0	0	0	0		2.7		3.20856	0	0	0
Amphinomidae spp.		0.047	0.047	0.329686		0	0	0		1.14857	0.575209	0.539407	0	0	0		0	0	0	0	0	0		0		0	0	0	0		0		0	0	0	0
Amphisamytha spp.		0	0	0		0.2	0.2	1.73461		2.03143	1.04421	0.954026	0	0	0		0.16	0.16	0.142634	0.695	0.519857	1.48704		0		0	0	0	0		0		0	0	0	0
Archinome sp.		0	0	0		0	0	0		0.729286	0.479728	0.342497	0	0	0		0.8	0.482286	0.713171	0	0	0		0		0	0	0	0		0		0	0	0	0
Bathykurila guaymasensis		0	0	0		0	0	0		0.145714	0.128395	0.0684322	0	0	0		0.29	0.29	0.258525	0	0	0		0		0	0	0	0		0		0	0	0	0
Brada sp. 1		0	0	0		0.1	0.1	0.867303		0.177857	0.134107	0.0835276	0.26	0.26	0.301974		0	0	0	0	0	0		0		0	0	0	0		1.8		2.13904	0	0	0
Branchipolynoe sp.		0	0	0		0	0	0		1.37657	0.742572	0.646483	0	0	0		0	0	0	0	0	0		0		0	0	0	0		0		0	0	0	0
Capitellidae unid.		0	0	0		0.065	0.065	0.563747		0.135714	0.0955304	0.0637359	0.276667	0.276667	0.321332		0	0	0	0.131667	0.131667	0.281718		0		0	0	0	0		5.4		6.41711	0.363333	0.363333	3.10541
Chaetopterus sp.		0	0	0		0	0	0		0.111429	0.0860351	0.0523305	0	0	0		0	0	0	0	0	0		0		0	0	0	0		0		0	0	0	0
Chrysopetalidae unid.		0	0	0		0	0	0		0.154286	0.154286	0.0724576	0	0	0		1.05	1.05	0.936037	0	0	0		0		0	0	0	0		0		0	0	0	0
Cirratulidae sp. 1		0	0	0		0	0	0		0.264286	0.264286	0.124117	0	0	0		0	0	0	0.0566667	0.0566667	0.121246		0		0	0	0	0		0		0	0	0	0
Cirratulidae unid.		0.094	0.094	0.659371		0.195	0.195	1.69124		0.355143	0.196274	0.166787	0.276667	0.276667	0.321332		0	0	0	0.246667	0.246667	0.527776		1.07		1.19048	0	0	0		5.4		6.41711	0.763333	0.193592	6.52422
Cossura unid.		0	0	0		0	0	0		0.078	0.0712251	0.0366314	0	0	0		0.035	0.035	0.0312012	0	0	0		0		0	0	0	0		1.8		2.13904	0.0466667	0.0466667	0.39886
Dorvillea sp.		0	0	0		0	0	0		0.454429	0.227281	0.213415	0	0	0		0.4675	0.342135	0.41676	0	0	0		0		0	0	0	0		0		0	0	0	0
Dorvilleidae sp. 2/3		0	0	0		0	0	0		0.192857	0.192857	0.0905721	0	0	0		0	0	0	0	0	0		0		0	0	0	0		0		0	0	0	0
Dorvilleidae sp. 4		0	0	0		0	0	0		0.0771429	0.0771429	0.0362288	0	0	0		0	0	0	0	0	0		0		0	0.4035	0.4035	1.99688		0		0	0	0	0
Dorvilleidae sp. 5		0	0	0		0	0	0		0.0371429	0.0371429	0.0174435	0	0	0		0	0	0	0	0	0		0		0	0	0	0		0		0	0	0	0
Escarpia sp.		0	0	0		0	0	0		2.70786	2.33659	1.2717	0	0	0		0	0	0	0	0	0		14.98		16.6667	0	0	0		0		0	0	0	0
Eurythoe sp.		0	0	0		0	0	0		0	0	0	0	0	0		0	0	0	0	0	0		1.07		1.19048	0	0	0		0		0	0	0	0
Fabrisabella sp.		0	0	0		0	0	0		0.192857	0.192857	0.0905721	0	0	0		0.035	0.035	0.0312012	0	0	0		0		0	0	0	0		0		0	0	0	0
Fauveliopsidae unid.		0	0	0		0.2	0.2	1.73461		0	0	0	0.26	0.26	0.301974		0	0	0	0	0	0		0		0	0	0	0		0.45		0.534759	0	0	0
Flabelligeridae sp. 3		0.088	0.088	0.617284		0	0	0		0	0	0	0	0	0		0	0	0	0	0	0		0		0	0	0	0		0		0	0	0	0
Flabelligeridae unid.		0	0	0		0	0	0		0.0928571	0.0928571	0.0436088	0	0	0		0.035	0.035	0.0312012	0.0566667	0.0566667	0.121246		0		0	0	0	0		0		0	0	0	0
Galapagomystides sp.		0	0	0		0	0	0		4.71929	2.54653	2.21633	0.276667	0.276667	0.321332		0.55	0.461411	0.490305	0.526667	0.526667	1.12687		52.43		58.3333	0.4035	0.4035	1.99688		0		0	0	0	0
Glyceridae unid.		0	0	0		0.1	0.1	0.867303		0	0	0	0	0	0		0	0	0	0	0	0		0		0	0	0	0		0		0	0	0	0
Hesionidae sp. (levinae)		0	0	0		0	0	0		0.0835714	0.0835714	0.0392479	0	0	0		0	0	0	0	0	0		0		0	0	0	0		0		0	0	0	0
Hesionidae sp. 1		0.141	0.141	0.989057		0.4	0.4	3.46921		0.51	0.306506	0.239513	0	0	0		0.48	0.48	0.427903	0	0	0		0		0	0	0	0		0		0	0	0	0
Hesionidae sp. 1A		0	0	0		0	0	0		0.0914286	0.0914286	0.0429379	0	0	0		0	0	0	0	0	0		0		0	0	0	0		0		0	0	0	0
Hesionidae sp. 2		0	0	0		0	0	0		1.14214	0.557751	0.536388	0.276667	0.276667	0.321332		0.8925	0.758984	0.795632	0.692	0.350723	1.48063		0		0	0	0	0		0		0	0	0	0
Hesionidae sp. 3 (deletabile)		0	0	0		0	0	0		0.175714	0.0936014	0.0825212	0.78	0.78	0.905923		0	0	0	0	0	0		0		0	0	0	0		0		0	0	0	0
Hesionidae sp. blue		0	0	0		0.2	0.2	1.73461		1.56214	1.22712	0.733634	0	0	0		0	0	0	0	0	0		0		0	0	0	0		0		0	1.3	1.3	11.1111
Hesionidae spp.		0	0	0		0	0	0		1.34171	0.776051	0.630113	0.713333	0.713333	0.828494		0.035	0.035	0.0312012	0	0	0		3.21		3.57143	0	0	0		1.8		2.13904	0.14	0.14	1.19658
Lacydoniidae spp.		0	0	0		0	0	0		1.90214	0.916231	0.893309	0	0	0		9.3625	8.48566	8.34633	0.707333	0.707333	1.51343		0		0	0	0	0		0		0	0	0	0
Lamellibrachia unid.		0	0	0		0	0	0		0.177429	0.121404	0.0833263	0	0	0		0	0	0	0	0	0		0		0	0	0	0		0		0	0	0	0
Laminatubus sp.		0	0	0		0	0	0		0.837857	0.837857	0.393485	0	0	0		0	0	0	0	0	0		0		0	0	0	0		0		0	0	0	0
Lumbrineridae unid.		0.188	0.188	1.31874		0.3	0.3	2.60191		0.0837143	0.0543973	0.039315	0.796667	0.450642	0.925281		0	0	0	0.616667	0.616667	1.31944		0		0	0	0	0		0.45		0.534759	0	0	0
Lumbrineridae sp. a		0	0	0		0.065	0.065	0.563747		0	0	0	0	0	0		0	0	0	0.281667	0.183165	0.602663		0		0	0	0	0		0		0	0	0	0
Maldanidae sp. 2		0	0	0		0.065	0.065	0.563747		0	0	0	0	0	0		0	0	0	0	0	0		0		0	0	0	0		0		0	0	0	0
Maldanidae unid.		0	0	0		0.065	0.065	0.563747		0.310714	0.191955	0.145922	0.553333	0.553333	0.642664		0	0	0	0.55	0.485187	1.1768		0		0	0	0	0		0		0	0.41	0.342394	3.50427
Nephtys spp.		0	0	0		0.195	0.195	1.69124		0.0678571	0.0678571	0.0318679	0	0	0		0	0	0	0	0	0		0		0	0	0	0		0		0	0	0	0
Nereis spp.		0	0	0		0	0	0		0.74	0.242596	0.347528	0	0	0		0.0725	0.0725	0.0646312	0	0	0		0		0	0	0	0		0.45		0.534759	0.0933333	0.0933333	0.797721
Nicomache sp.		0	0	0		0	0	0		0.182857	0.182857	0.0858757	0.713333	0.713333	0.828494		1.1575	1.06621	1.03187	0	0	0		0		0	0	0	0		0		0	0	0	0
Onuphidae unid.		0	0	0		0	0	0		0	0	0	0.26	0.26	0.301974		0	0	0	0	0	0		0		0	0	0	0		0		0	0	0	0
Ophryotrocha sp. 3		0	0	0		0	0	0		0	0	0	0	0	0		0.145	0.145	0.129262	0	0	0		0		0	0	0	0		0		0	0	0	0
Ophrytrocha spp.		0.094	0.094	0.659371		0	0	0		3.38186	2.99541	1.58823	0	0	0		0	0	0	0	0	0		0		0	0	0	0		0		0	0	0	0
Paraonidae sp. 2		0	0	0		0.195	0.195	1.69124		0	0	0	0	0	0		0	0	0	0	0	0		0		0	0	0	0		0		0	0	0	0
Paraonidae sp. 3		0	0	0		0.065	0.065	0.563747		0	0	0	0	0	0		0	0	0	0	0	0		0		0	0	0	0		0		0	0	0	0
Paraonidae sp. a		0	0	0		0.065	0.065	0.563747		0	0	0	0	0	0		0	0	0	0	0	0		0		0	0	0	0		0		0	0	0	0
Paraonidae unid.		0	0	0		0.4	0.4	3.46921		2.56286	1.37338	1.2036	0	0	0		0.7875	0.7875	0.702028	0.45	0.207171	0.962835		0		0	0	0	0		0.9		1.06952	1.14333	0.676026	9.77208
Parougia sp.		0	0	0		0	0	0		0.1	0.1	0.0469633	0	0	0		0	0	0	0	0	0		0		0	0	0	0		0		0	0	0	0
Phyllodocidae unid.		0	0	0		0	0	0		0.147857	0.147857	0.0694386	0	0	0		0	0	0	1.40167	1.21095	2.99905		0		0	0	0	0		0		0	0	0	0
Pilargidae unid.		0	0	0		0	0	0		0.0678571	0.0678571	0.0318679	0	0	0		0	0	0	0	0	0		0		0	0	0	0		0		0	0	0	0
Polychaeta unid.		0	0	0		0	0	0		0	0	0	0	0	0		0.07	0.07	0.0624025	0	0	0		0		0	0	0	0		0		0	0	0	0
Polycirrus sp. 1		0	0	0		0	0	0		0.477857	0.324827	0.224417	0.83	0.83	0.963995		0	0	0	0	0	0		0		0	0	0	0		0		0	0	0	0
Polynoidae 4501-L2		0	0	0		0	0	0		0.0185714	0.0185714	0.00872175	0	0	0		0	0	0	0	0	0		0		0	0	0	0		0		0	0	0	0
Polynoidae juv. unid.		0	0	0		0	0	0		0.0278571	0.0278571	0.0130826	0	0	0		0	0	0	0	0	0		0		0	0	0	0		0		0	0	0	0
Polynoidae sp. 1		0	0	0		0	0	0		0.0487143	0.0398059	0.0228778	0	0	0		0	0	0	0	0	0		0		0	0	0	0		0		0	0	0	0
Polynoidae sp. 2		0	0	0		0	0	0		0.00928571	0.00928571	0.00436088	0	0	0		0	0	0	0	0	0		0		0	0	0	0		0		0	0	0	0
Polynoidae unid.		0.088	0.088	0.617284		0.3	0.3	2.60191		0.930429	0.3097	0.43696	0	0	0		0.79	0.456399	0.704257	1.0805	0.632556	2.31187		0		0	1.5675	0.8535	7.7574		2.25		2.6738	0	0	0
Prionospio sp.		0	0	0		0.165	0.035	1.43105		0.312429	0.213935	0.146727	0	0	0		0.24	0.24	0.213951	0	0	0		0		0	0	0	0		0.45		0.534759	0	0	0
Sabellidae sp. 1		0	0	0		0	0	0		0	0	0	0	0	0		0	0	0	0	0	0		0		0	0	0	0		27.9		33.1551	0	0	0
Sabellidae unid.		9.05	3.31802	63.482		0.2	0.2	1.73461		0.72	0.542769	0.338136	0	0	0		0	0	0	0	0	0		0		0	0	0	0		0		0	0.26	0.26	2.22222
Serpulidae sp. C		0	0	0		0	0	0		0.191429	0.191429	0.0899011	0	0	0		0	0	0	0	0	0		0		0	0	0	0		0		0	0	0	0
Serpulidae unid.		0	0	0		0	0	0		0.459429	0.240759	0.215763	0	0	0		0.665	0.496211	0.592824	0	0	0		0		0	0	0	0		0		0	0	0	0
Sipuncula unid.		0	0	0		0	0	0		0	0	0	0	0	0		0.035	0.035	0.0312012	0	0	0		0		0	0	0	0		0		0	0	0	0
Sphaerodoridae unid.		0	0	0		0	0	0		0.113571	0.0779378	0.0533369	0	0	0		0	0	0	0	0	0		0		0	0.4035	0.4035	1.99688		0		0	0	0	0
Spionidae sp. 2		0	0	0		0.13	0.13	1.12749		0	0	0	0	0	0		0	0	0	0	0	0		0		0	0	0	0		0		0	0	0	0
Spionidae sp. 3		0	0	0		0	0	0		0.45	0.45	0.211335	0	0	0		0.175	0.175	0.156006	0	0	0		0		0	0	0	0		0		0	0	0	0
Spionidae unid.		0.176	0.176	1.23457		0	0	0		0.274286	0.150317	0.128814	0	0	0		0.0725	0.0725	0.0646312	0	0	0		0		0	0	0	0		1.35		1.60428	0	0	0
Syllidae unid.		0.094	0.094	0.659371		0.665	0.535	5.76756		1.68371	1.61563	0.790728	3.21667	0.0578312	3.73597		3.4725	2.12091	3.09561	1.65	1.45556	3.53039		0		0	0	0	0		8.1		9.62567	1.65333	1.51549	14.1311
Terebellida unid.		0	0	0		0	0	0		3.69657	3.07604	1.73603	0	0	0		0.175	0.175	0.156006	0	0	0		0		0	0	0	0		0.9		1.06952	0.52	0.52	4.44444
Terebellidae sp. 1		0	0	0		0	0	0		0.0278571	0.0278571	0.0130826	0	0	0		0.0725	0.0725	0.0646312	0	0	0		0		0	0	0	0		0		0	0	0	0
Terebellidae sp. 1a		0	0	0		0	0	0		0.0171429	0.0171429	0.00805085	0	0	0		0	0	0	0	0	0		0		0	0	0	0		0		0	0	0	0
Terebellidae sp. 2		0	0	0		0	0	0		0.238571	0.187012	0.112041	0	0	0		0.2175	0.2175	0.193893	0	0	0		0		0	0	0	0		7.2		8.55615	0	0	0
Terebellidae sp. 3		0	0	0		0	0	0		0.0678571	0.0678571	0.0318679	0	0	0		0	0	0	0	0	0		0		0	0	0	0		0		0	0	0	0
Terebellidae sp. 4		0.176	0.176	1.23457		0	0	0		0	0	0	0	0	0		0	0	0	0	0	0		0		0	0	0	0		0		0	0	0	0
Terebellidae unid.		0.352	0.352	2.46914		0	0	0		0.347143	0.238361	0.16303	0.276667	0.276667	0.321332		0	0	0	0.123333	0.123333	0.263888		0		0	0	0	0		0		0	0	0	0
Thrausmatos sp.		0	0	0		1	1	8.67303		7.94386	5.37036	3.7307	13.7767	8.15703	16.0008		11.2	11.2	9.9844	0.850167	0.661075	1.81904		0		0	0	0	0		0		0	0	0	0
Trichobranchidae sp. 1		0	0	0		0	0	0		0.707143	0.38208	0.332098	0	0	0		1.295	0.995502	1.15445	0	0	0		0		0	0	0	0		0		0	0	0	0
Tubificidae unid.		0	0	0		0	0	0		0	0	0	0	0	0		0.145	0.145	0.129262	0	0	0		0		0	0	0	0		0.45		0.534759	0	0	0
Vigtorniella sp.		0	0	0		0	0	0		0.135714	0.135714	0.0637359	0	0	0		0	0	0	0	0	0		0		0	0	0	0		0		0	0	0	0
Arthropoda
Alvinocaris sp. 1		0	0	0		0	0	0		0.588571	0.588571	0.276412	0	0	0		0	0	0	0	0	0		0		0	0	0	0		0		0	0	0	0
Ampeliscidae unid.		0	0	0		0.4	0.4	3.46921		0	0	0	0	0	0		0	0	0	0	0	0		0		0	0	0	0		0		0	0	0	0
Caprellidae unid.		0	0	0		0	0	0		0	0	0	0	0	0		0	0	0	0	0	0		0		0	0	0	0		0.9		1.06952	0.26	0.26	2.22222
Cirripedia unid.		0	0	0		0	0	0		0	0	0	0	0	0		0	0	0	0	0	0		0		0	0	0	0		0		0	1.13667	1.06743	9.7151
Cirripedia sp. 1		0	0	0		0	0	0		0	0	0	0	0	0		0	0	0	0.168333	0.168333	0.360171		0		0	0	0	0		0		0	0	0	0
Cumacea sp.		0	0	0		0	0	0		0.351571	0.344557	0.165109	0	0	0		0	0	0	0.176833	0.176833	0.378358		0		0	0	0	0		0		0	0	0	0
Cumacea sp. 1		0	0	0		0	0	0		0.0642857	0.0642857	0.0301907	0	0	0		0	0	0	0	0	0		0		0	0	0	0		0		0	0	0	0
Cumacea sp. 2		0	0	0		0.065	0.065	0.563747		0	0	0	0	0	0		0	0	0	0	0	0		0		0	0	0	0		0		0	0	0	0
Galatheidae sp.		0	0	0		0	0	0		0.0171429	0.0171429	0.00805085	0	0	0		0	0	0	0	0	0		0		0	0	0	0		0		0	0	0	0
Gammaridae sp. 1		0	0	0		0	0	0		0	0	0	0	0	0		1.05	1.05	0.936037	4.325	3.46457	9.25391		0		0	0	0	0		0		0	0	0	0
Gammaridae sp. 2		0	0	0		1.225	0.575	10.6245		0.191429	0.191429	0.0899011	0	0	0		0	0	0	0	0	0		0		0	0	0	0		0		0	0	0	0
Gammaridae sp. 3		0	0	0		0.065	0.065	0.563747		0	0	0	0	0	0		0	0	0	0	0	0		0		0	0	0	0		0		0	0	0	0
Gammaridae sp. 4		0	0	0		0	0	0		0	0	0	0	0	0		0	0	0	0.168333	0.168333	0.360171		0		0	0	0	0		0		0	0	0	0
Gammaridae sp. 5		0	0	0		0	0	0		1.80786	1.53496	0.849029	0	0	0		0.07	0.07	0.0624025	0	0	0		0		0	0.4035	0.4035	1.99688		0		0	0.726667	0.726667	6.21083
Gammaridae unid.		0	0	0		1	1	8.67303		0.926143	0.558212	0.434947	2.47	1.11805	2.86876		7.965	7.28184	7.10051	12.8078	6.54111	27.4041		0		0	0	0	0		2.7		3.20856	0	0	0
Gnathia sp.		0	0	0		0	0	0		0	0	0	0	0	0		0	0	0	0	0	0		0		0	0.4035	0.4035	1.99688		0		0	0	0	0
Halacarida unid.		0	0	0		0	0	0		1.08571	1.08571	0.509887	0.616667	0.319496	0.716221		0.88	0.88	0.784489	0	0	0		0		0	0	0	0		0		0	0	0	0
Isopoda unid.		0	0	0		0.365	0.235	3.16565		0.107857	0.0982941	0.0506533	0.26	0.26	0.301974		0	0	0	0.0566667	0.0566667	0.121246		0		0	0	0	0		1.8		2.13904	0.0466667	0.0466667	0.39886
Kiwa puravida		0	0	0		0	0	0		4.435	2.8607	2.08282	0	0	0		0	0	0	0	0	0		0		0	0	0	0		0		0	0	0	0
Lithodidae sp.		0	0	0		0	0	0		0.0185714	0.0185714	0.00872175	0	0	0		0.2625	0.2625	0.234009	0.353667	0.353667	0.756717		0		0	0	0	0		0		0	0	0	0
Salvatiella cf. salva		0	0	0		0	0	0		0.2	0.145632	0.0939266	0.553333	0.553333	0.642664		0	0	0	0	0	0		0		0	0	0	0		0		0	0	0	0
Tanaidacea unid.		0	0	0		0.065	0.065	0.563747		0.335714	0.274083	0.157662	0.813333	0.47949	0.944638		2.9825	1.65881	2.65879	1.89167	1.26221	4.04747		0		0	0.4035	0.4035	1.99688		0.9		1.06952	1.23667	0.599175	10.5698
Echinodermata
Ophiuroidea sp. 1		0	0	0		0	0	0		0.312857	0.220784	0.146928	1.23333	0.638992	1.43244		0	0	0	0	0	0		0		0	1.4745	0.6675	7.29716		0		0	0	0	0
Ophiuroidea sp. 2		0	0	0		0	0	0		0	0	0	0	0	0		0	0	0	0	0	0		0		0	0.7605	0.0465	3.76364		0		0	0	0	0
Ophiuroidea sp. 3		0	0	0		0	0	0		0	0	0	0	0	0		0	0	0	0	0	0		0		0	0.4035	0.4035	1.99688		0		0	0	0	0
Ophiuroidea sp. 5		0	0	0		0.195	0.195	1.69124		0	0	0	0	0	0		0	0	0	0	0	0		0		0	2.421	2.421	11.9813		0		0	0	0	0
Ophiuroidea sp. 5a		0	0	0		0	0	0		0	0	0	0	0	0		0.5475	0.214762	0.488077	0	0	0		0		0	0.807	0.807	3.99376		0		0	0	0	0
Ophiuroidea sp. 6a		0	0	0		0	0	0		0	0	0	0	0	0		0	0	0	0	0	0		0		0	1.2105	1.2105	5.99065		0		0	0	0	0
Ophiuroidea unid.		0	0	0		0.2	0.2	1.73461		0	0	0	0	0	0		1.725	1.13826	1.53778	1.17333	0.62096	2.5105		0		0	0	0	0		0.9		1.06952	0	0	0
Thalassometra sp.		0	0	0		0	0	0		0	0	0	0	0	0		0	0	0	0	0	0		0		0	0.4035	0.4035	1.99688		0		0	0	0	0
Hemichordata
Enteropneusta unid.		0	0	0		0	0	0		0.0492857	0.0492857	0.0231462	0	0	0		0	0	0	0	0	0		0		0	0	0	0		0		0	0.363333	0.363333	3.10541
Mollusca
Acharax sp.		0	0	0		0	0	0		0.142857	0.142857	0.0670904	0	0	0		0	0	0	0	0	0		0		0	0	0	0		0		0	0	0	0
Alvania sp.		0	0	0		0	0	0		0	0	0	0	0	0		0.08	0.08	0.0713171	0.168333	0.168333	0.360171		0		0	0	0	0		0		0	0	0	0
Anatoma sp.		0	0	0		0	0	0		0	0	0	0	0	0		0	0	0	0.336667	0.336667	0.720343		0		0	0	0	0		0		0	0	0	0
Aplacophora sp.		0	0	0		0.065	0.065	0.563747		0.0142857	0.0142857	0.00670904	0.616667	0.319496	0.716221		0	0	0	0.0566667	0.0566667	0.121246		0		0	0	0	0		0		0	0	0	0
Aplacophora sp. F		0	0	0		0	0	0		0	0	0	0	0	0		0	0	0	0.168333	0.168333	0.360171		0		0	0	0	0		0		0	0	0	0
Aplacophora sp. P		0	0	0		0	0	0		0	0	0	0.713333	0.713333	0.828494		0	0	0	0	0	0		0		0	0	0	0		0		0	0	0	0
Architectonicide unid.		0	0	0		0	0	0		0.00714286	0.00714286	0.00335452	0	0	0		0.08	0.08	0.0713171	0	0	0		0		0	0	0	0		0		0	0	0	0
Bathyacmaea sp.		0	0	0		0	0	0		26.4193	12.5034	12.4074	0.26	0.26	0.301974		8.8375	7.19684	7.87832	0.168333	0.168333	0.360171		0		0	0.807	0.807	3.99376		0		0	0	0	0
Bathymodiolus sp.		0	0	0		0	0	0		0.61	0.316603	0.286476	0	0	0		0.5775	0.336164	0.514821	0	0	0		0		0	0	0	0		0		0	0	0	0
Bathymodiolus sp. 1		0	0	0		0	0	0		0.246429	0.246429	0.115731	0	0	0		0.28	0.28	0.24961	0.113333	0.113333	0.242492		0		0	0	0	0		0		0	0	0	0
Bathymodiolus sp. 2		0	0	0		0	0	0		0.234286	0.161483	0.110028	0	0	0		0.175	0.175	0.156006	0	0	0		0		0	0	0	0		0		0	0	0	0
Bivalvia juv. unid.		0	0	0		0.065	0.065	0.563747		0.325	0.191199	0.152631	0	0	0		0.07	0.07	0.0624025	0.0566667	0.0566667	0.121246		1.07		1.19048	0	0	0		0		0	0.26	0.26	2.22222
Bivalvia sp. o		0	0	0		0.065	0.065	0.563747		0	0	0	0	0	0		0	0	0	0	0	0		0		0	0	0	0		0		0	0	0	0
Bivalvia sp. r		0	0	0		0.52	0.52	4.50997		0	0	0	0	0	0		0	0	0	0	0	0		0		0	0	0	0		0		0	0	0	0
Bivalvia unid.		0.235	0.235	1.64843		0	0	0		0.175143	0.107336	0.0822528	0	0	0		0	0	0	0	0	0		0		0	0	0	0		0		0	0	0	0
Cantrainea panamense		0	0	0		0	0	0		0.478	0.257252	0.224485	0	0	0		0.14	0.14	0.124805	0	0	0		0		0	0	0	0		0		0	0	0	0
Cataegis sp.		0	0	0		0	0	0		3.54857	1.63669	1.66653	0.356667	0.356667	0.414247		2.3625	2.3625	2.10608	0	0	0		0		0	0	0	0		0		0	0	0	0
Polyplacophora sp.		0	0	0		0.065	0.065	0.563747		0.574429	0.474986	0.269771	0	0	0		0.7	0.494975	0.624025	0.225	0.166528	0.481417		0		0	0	0	0		0.9		1.06952	0	0	0
Polyplacophora sp. 1		0	0	0		0	0	0		3.26429	1.40504	1.53302	0.356667	0.356667	0.414247		0.56	0.56	0.49922	0	0	0		0		0	0	0	0		0		0	0	0	0
Polyplacophora sp. 4		0	0	0		0	0	0		0	0	0	0	0	0		0	0	0	0	0	0		1.07		1.19048	0	0	0		0		0	0	0	0
Cuspidaria sp. 1		0	0	0		0.13	0.13	1.12749		0	0	0	0.276667	0.276667	0.321332		0	0	0	0	0	0		0		0	0	0	0		0		0	0	0	0
Cuspidaria sp. 2		0	0	0		0.065	0.065	0.563747		0	0	0	0	0	0		0	0	0	0	0	0		0		0	0	0	0		0		0	0	0	0
Diploura sp.		0	0	0		0	0	0		0	0	0	0	0	0		0	0	0	0.505	0.344981	1.08051		1.07		1.19048	0	0	0		0		0	0	0	0
Gastropoda ("moon snail")		0	0	0		0	0	0		0	0	0	0	0	0		0.035	0.035	0.0312012	0	0	0		0		0	0	0	0		0		0	0	0	0
Gastropoda ridged		0	0	0		0.065	0.065	0.563747		0	0	0	0	0	0		0	0	0	0	0	0		0		0	0	0	0		0		0	0	0	0
Gastropoda sp. 2		0	0	0		0.065	0.065	0.563747		0.0557143	0.0557143	0.0261653	0	0	0		0	0	0	0	0	0		0		0	0	0	0		0		0	0	0	0
Gastropoda unid. "Limpet"		0.686	0.385274	4.81201		0	0	0		0.792143	0.358422	0.372016	0	0	0		0.08	0.08	0.0713171	0	0	0		0		0	0	0	0		1.8		2.13904	0	0	0
Gastropoda unid. "Snail"		0	0	0		0	0	0		0.180714	0.102166	0.0848694	0.26	0.26	0.301974		0	0	0	0	0	0		0		0	0	0	0		0		0	0	0	0
Hyalogyrina sp.		0	0	0		0.3	0.3	2.60191		0.0821429	0.0682608	0.038577	0.633333	0.324157	0.735579		0	0	0	0.6	0.383701	1.28378		0		0	0	0	0		0		0	0	0	0
Iothia sp.		0	0	0		0	0	0		0.356429	0.338399	0.167391	0	0	0		0	0	0	0	0	0		0		0	0	0	0		0		0	0	0	0
Kurtiella sp.		0	0	0		0	0	0		0	0	0	0	0	0		0	0	0	0.336667	0.336667	0.720343		0		0	0	0	0		0		0	0	0	0
Lepetodrilus aff. shannonae		0	0	0		0	0	0		0.102857	0.102857	0.0483051	0	0	0		0	0	0	0	0	0		0		0	0	0	0		0		0	0	0	0
Lepetodrilus guaymasensi		0.416	0.416	2.91807		0	0	0		16.1586	6.12503	7.5886	0.26	0.26	0.301974		1.505	0.995502	1.34165	0.336667	0.336667	0.720343		0		0	0.807	0.807	3.99376		3.6		4.27807	0	0	0
Lepetodrilus sp. 4		0	0	0		0	0	0		0	0	0	0	0	0		0	0	0	0	0	0		0		0	0	0	0		0.45		0.534759	0	0	0
Levinaegyra sp.		0	0	0		0	0	0		0.111429	0.111429	0.0523305	0	0	0		0	0	0	0	0	0		0		0	0	0	0		0		0	0	0	0
Lurifax sp.		0	0	0		0	0	0		0.346429	0.338811	0.162694	0	0	0		0.6925	0.322319	0.617339	0.505	0.505	1.08051		0		0	0	0	0		0		0	0	0	0
Mytilidae juv. unid.		0	0	0		0	0	0		0.0864286	0.0689609	0.0405897	0	0	0		0	0	0	0	0	0		0		0	0	0	0		0		0	0	0	0
Neolepetopsis nov. sp.		0	0	0		0	0	0		17.7121	8.03774	8.3182	0	0	0		0.1075	0.0692068	0.0958324	0	0	0		0		0	0	0	0		0		0	0	0	0
Neomphalina sp.		0	0	0		0	0	0		3.39643	3.19453	1.59507	0	0	0		0	0	0	0	0	0		0		0	0	0	0		0		0	0	0	0
Nuculoida sp.		0	0	0		0	0	0		0.0571429	0.0571429	0.0268362	0	0	0		0.44	0.221472	0.392244	0	0	0		0		0	0	0	0		0		0	0	0	0
Paralepetopsis sp. a		0	0	0		0	0	0		7.02571	2.92831	3.29951	0.356667	0.356667	0.414247		8.795	5.49698	7.84043	0.246667	0.246667	0.527776		0		0	0	0	0		0		0	0	0	0
Paralepetopsis sp. b		0	0	0		0	0	0		0.0714286	0.0641329	0.0335452	0	0	0		0	0	0	0	0	0		0		0	0	0	0		0		0	0	0	0
Paralepetopsis sp. c		0	0	0		0	0	0		0.0342857	0.0342857	0.0161017	0	0	0		0	0	0	0	0	0		0		0	0	0	0		0		0	0	0	0
Pectinoidea unid.		0.481	0.236719	3.37402		0	0	0		0	0	0	0	0	0		0	0	0	0	0	0		0		0	0	0	0		0		0	0	0	0
Provanna cf. laevis		0	0	0		0	0	0		29.8643	19.8715	14.0253	0.26	0.26	0.301974		20.1525	16.8126	17.9652	1.8	1.35326	3.85134		0		0	1.2105	1.2105	5.99065		0		0	0	0	0
Pyramidellidae unid.		0	0	0		0	0	0		0	0	0	0	0	0		0	0	0	0	0	0		0		0	0.4035	0.4035	1.99688		0		0	0	0	0
Pyropelta corymba		0	0	0		0	0	0		26.0364	12.5888	12.2276	0	0	0		4.865	3.92802	4.33697	0	0	0		0		0	0.4035	0.4035	1.99688		0		0	0	0	0
Scaphopoda sp.		0	0	0		0	0	0		0.0957143	0.0779456	0.0449506	0	0	0		0	0	0	0	0	0		0		0	0	0	0		0		0	0	0	0
Solemyidae sp.		0	0	0		0.585	0.585	5.07372		0	0	0	0	0	0		0	0	0	0	0	0		0		0	0	0	0		0		0	0	0	0
Thyasira sp.		0	0	0		0	0	0		0	0	0	0.26	0.26	0.301974		0	0	0	0	0	0		0		0	0	0	0		0		0	0	0	0
Turridae sp.		0	0	0		0	0	0		0	0	0	0	0	0		0.145	0.145	0.129262	0.841667	0.841667	1.80086		0		0	0	0	0		0		0	0	0	0
Vesicomyidae sp.		0	0	0		0.195	0.195	1.69124		0.00714286	0.00714286	0.00335452	0	0	0		0	0	0	0	0	0		0		0	0	0	0		0		0	0	0	0
Xyloskenea sp.		0	0	0		0	0	0		0.0557143	0.0557143	0.0261653	0	0	0		0.08	0.08	0.0713171	0	0	0		0		0	0	0	0		0		0	0	0	0
Yoldiella sp.		0	0	0		0.1	0.1	0.867303		0.05	0.05	0.0234816	0	0	0		0.415	0.223625	0.369958	0	0	0		0		0	0	0	0		0		0	0	0	0
Nemertea
Nemertea spp.		0	0	0		0	0	0		0.374286	0.26696	0.175777	0	0	0		0	0	0	0.5135	0.347564	1.0987		12.84		14.2857	0.4035	0.4035	1.99688		0		0	0.456667	0.32682	3.90313
Platyhelminthes
Platyhelminthea unid.		0	0	0		0	0	0		0	0	0	0	0	0		0	0	0	0	0	0		0		0	0.357	0.357	1.76676		0		0	0	0	0
Turbellaria sp.		0	0	0		0	0	0		0.00657143	0.00657143	0.00308616	0	0	0		0	0	0	0.168333	0.168333	0.360171		0		0	0	0	0		0		0	0	0	0
Cnidaria
Actiniaria unid.		0	0	0		0	0	0		0.325714	0.174692	0.152966	0	0	0		1.82	1.82	1.62246	0	0	0		0		0	2.8245	2.8245	13.9782		0		0	0	0	0
Alcyonaria Coral polyps-4505 unid.		0	0	0		0	0	0		0	0	0	0	0	0		0.7875	0.7875	0.702028	0	0	0		0		0	0	0	0		0		0	0	0	0
Alcyonaria Gorgonian unid.		0	0	0		0	0	0		0	0	0	0	0	0		0	0	0	0	0	0		0		0	0.7605	0.0465	3.76364		0		0	0	0	0
Anthozoa sp.		0.846	0.846	5.93434		0.1	0.1	0.867303		2.65571	1.68302	1.24721	0	0	0		1.5425	1.21791	1.37508	0	0	0		0		0	0	0	0		0		0	0	0	0
Hydrozoa unid. (indiv.)		0.176	0.176	1.23457		0.1	0.1	0.867303		7.75	7.71162	3.63965	52	52	60.3949		3.36	3.36	2.99532	0.508333	0.388539	1.08765		0		0	0	0	0		0.45		0.534759	0.52	0.52	4.44444
Hydrozoa unid. (colonial)		0	0	0		0	0	0		0	0	0	0	0	0		0.735	0.735	0.655226	7.07	7.07	15.1272		0		0	0.7605	0.0465	3.76364		0		0	0	0	0
Brachiopoda
Brachiopoda unid.		0.564	0.564	3.95623		0	0	0		0	0	0	0	0	0		0	0	0	0	0	0		0		0	0	0	0		0		0	0	0	0
Total macrofauna/200 cm2		14.256	7.97901			11.53	10.49			212.932	125.308		86.1	73.7919			112.175	93.9331		46.737	34.9217			89.88	0		20.2065	16.5435			84.15	0		11.7	9.62093
